# Supplementary material for: Hydrogen bonding inside and outside carbon nanotubes: HF dimer as a case study
Source: Royal Society of Chemistry journal article supplement (doi:10.1039/c5cp04153h), 2015-12-08
Supplement: c5cp04153h1.pdf [file c5cp04153h1.pdf]

# Hydrogen bonding inside and outside carbon nanotubes: HF dimer as a case study

Agnieszka Roztoczyńska\*, Justyna Kozłowska, Paweł Lipkowski and Wojciech Bartkowiak

Department of Physical and Quantum Chemistry, Wrocław University of Technology  
Wybrzeże Wyspiańskiego 27, PL-50370 Wrocław, Poland

\*Corresponding author E-mail: agnieszka.roztoczynska@pwr.edu.pl

## Electronic Supplementary Information

**Table 1** The interaction energy values [kcal/mol] calculated for the isolated hydrogen fluoride dimer at different levels of theoretical approximation.

|             | HF   | MP2  | CCSD | CCSD(T) | CCSD(T)-F12a | CCSD(T)-F12b | CCSD(T)-F12c |
|-------------|------|------|------|---------|--------------|--------------|--------------|
| cc-pVDZ     | -3.7 | -3.5 | -3.3 | -3.4    | -3.9         | -3.8         | -3.8         |
| cc-pVTZ     | -3.4 | -3.4 | -3.4 | -3.4    | -3.7         | -3.7         | -3.7         |
| cc-pVQZ     | -3.3 | -3.5 | -3.5 | -3.5    | -3.7         | -3.6         | -3.6         |
| cc-pV5Z     | -3.3 | -3.5 | -3.5 | -3.5    | -3.6         | -3.6         | -3.6         |
| cc-pV6Z     | -3.3 | -3.5 | -3.5 | -3.6    | -            | -            | -            |
| aug-cc-pVDZ | -3.1 | -3.0 | -3.0 | -3.0    | -3.5         | -3.5         | -3.5         |
| aug-cc-pVTZ | -3.2 | -3.3 | -3.3 | -3.4    | -3.6         | -3.6         | -3.6         |
| aug-cc-pVQZ | -3.2 | -3.4 | -3.5 | -3.5    | -3.6         | -3.6         | -3.6         |
| aug-cc-pV5Z | -3.3 | -3.5 | -3.5 | -3.6    | -3.6         | -3.6         | -3.6         |
| cc-pVDZ-F12 | -3.1 | -3.0 | -3.0 | -3.0    | -3.5         | -3.5         | -3.5         |
| cc-pVTZ-F12 | -3.3 | -3.3 | -3.4 | -3.4    | -3.6         | -3.5         | -3.6         |
| cc-pVQZ-F12 | -3.3 | -3.4 | -3.5 | -3.5    | -3.6         | -3.6         | -3.6         |

  

|             | B3LYP | B3LYP-D3 | CAM-B3LYP | PBE0 | M06-HF | M06-2X | M06  |
|-------------|-------|----------|-----------|------|--------|--------|------|
| cc-pVDZ     | -4.0  | -4.4     | -4.6      | -4.1 | -4.0   | -4.3   | -4.0 |
| cc-pVTZ     | -3.7  | -4.1     | -4.4      | -3.8 | -4.0   | -4.3   | -3.4 |
| cc-pVQZ     | -3.5  | -3.9     | -4.2      | -3.7 | -3.7   | -4.0   | -3.1 |
| cc-pV5Z     | -3.4  | -3.8     | -4.1      | -3.6 | -3.7   | -3.9   | -3.0 |
| cc-pV6Z     | -3.4  | -3.7     | -4.0      | -3.5 | -3.7   | -3.9   | -3.0 |
| aug-cc-pVDZ | -3.2  | -3.6     | -3.8      | -3.4 | -3.5   | -3.7   | -3.2 |
| aug-cc-pVTZ | -3.3  | -3.7     | -3.9      | -3.4 | -3.7   | -3.9   | -2.9 |
| aug-cc-pVQZ | -3.3  | -3.7     | -4.0      | -3.5 | -3.6   | -3.9   | -2.9 |
| aug-cc-pV5Z | -3.3  | -3.7     | -4.0      | -3.5 | -3.6   | -3.9   | -2.9 |

**Table 2** The interaction energy and BSSE values [kcal/mol] calculated for the complexes formed between  $(\text{HF})_2$  and  $(4,4)\text{CNT}$  using different DFT functionals (step number -27). The carbon nanotubes have been represented by the cc-pVDZ or cc-pVTZ basis sets, whereas the HF dimer is described using aug-cc-pVDZ or aug-cc-pVTZ. Symbol *CP* refers to results obtained using the counterpoise correction scheme.

| double- $\zeta$ quality |                                                   |                                                               |      |                                                  |                                                   |                                                               |      |                                                   |  |
|-------------------------|---------------------------------------------------|---------------------------------------------------------------|------|--------------------------------------------------|---------------------------------------------------|---------------------------------------------------------------|------|---------------------------------------------------|--|
|                         | $\Delta E_{(\text{HF})_2@(\text{4,4})\text{CNT}}$ | $\Delta E_{(\text{HF})_2@(\text{4,4})\text{CNT}}^{\text{CP}}$ | BSSE | $\Delta E_{\text{HF}\dots\text{HF}}^{\text{in}}$ | $\Delta E_{(\text{HF})_2-(\text{4,4})\text{CNT}}$ | $\Delta E_{(\text{HF})_2-(\text{4,4})\text{CNT}}^{\text{CP}}$ | BSSE | $\Delta E_{\text{HF}\dots\text{HF}}^{\text{out}}$ |  |
| B3LYP                   | 23.6                                              | 30.7                                                          | 7.1  | -2.5                                             | 1.6                                               | 3.3                                                           | 1.7  | -3.1                                              |  |
| B3LYP-D3                | -0.5                                              | 6.5                                                           | 7.0  | -2.9                                             | -3.2                                              | -1.4                                                          | 1.7  | -3.5                                              |  |
| CAM-B3LYP               | 14.4                                              | 21.1                                                          | 6.8  | -2.9                                             | 0.0                                               | 1.7                                                           | 1.7  | -3.8                                              |  |
| PBE0                    | 14.1                                              | 22.8                                                          | 8.7  | -2.6                                             | 0.3                                               | 1.9                                                           | 1.6  | -3.2                                              |  |
| M06-HF                  | -10.0                                             | -1.1                                                          | 8.8  | -2.0                                             | -3.5                                              | -1.6                                                          | 1.9  | -3.5                                              |  |
| M06-2X                  | -9.1                                              | -2.5                                                          | 6.6  | -3.1                                             | -2.9                                              | -1.4                                                          | 1.5  | -3.7                                              |  |
| M06                     | 0.2                                               | 8.1                                                           | 7.9  | -1.1                                             | -1.8                                              | -0.2                                                          | 1.7  | -3.4                                              |  |
| triple- $\zeta$ quality |                                                   |                                                               |      |                                                  |                                                   |                                                               |      |                                                   |  |
|                         | $\Delta E_{(\text{HF})_2@(\text{4,4})\text{CNT}}$ | $\Delta E_{(\text{HF})_2@(\text{4,4})\text{CNT}}^{\text{CP}}$ | BSSE | $\Delta E_{\text{HF}\dots\text{HF}}^{\text{in}}$ | $\Delta E_{(\text{HF})_2-(\text{4,4})\text{CNT}}$ | $\Delta E_{(\text{HF})_2-(\text{4,4})\text{CNT}}^{\text{CP}}$ | BSSE | $\Delta E_{\text{HF}\dots\text{HF}}^{\text{out}}$ |  |
| B3LYP                   | 28.8                                              | 30.2                                                          | 1.4  | -2.5                                             | 2.7                                               | 3.2                                                           | 0.5  | -3.3                                              |  |
| B3LYP-D3                | 4.6                                               | 6.0                                                           | 1.3  | -2.9                                             | -2.0                                              | -1.5                                                          | 0.5  | -3.7                                              |  |
| CAM-B3LYP               | 19.3                                              | 20.7                                                          | 1.4  | -3.0                                             | 1.1                                               | 1.6                                                           | 0.5  | -3.9                                              |  |
| PBE0                    | 20.9                                              | 22.3                                                          | 1.4  | -2.7                                             | 1.4                                               | 1.8                                                           | 0.5  | -3.3                                              |  |
| M06-HF                  | -4.1                                              | 0.7                                                           | 4.8  | -2.2                                             | -2.4                                              | -1.2                                                          | 1.2  | -3.8                                              |  |
| M06-2X                  | -5.2                                              | -3.3                                                          | 1.9  | -3.4                                             | -2.3                                              | -1.8                                                          | 0.5  | -4.0                                              |  |
| M06                     | 2.2                                               | 5.5                                                           | 3.3  | -1.0                                             | -1.5                                              | -0.8                                                          | 0.8  | -3.3                                              |  |

**Table 3** The interaction energy and BSSE values [kcal/mol] calculated for the complexes formed between  $(\text{HF})_2$  and  $(5,5)\text{CNT}$  using different DFT functionals (step number -27). The carbon nanotubes have been represented by the cc-pVDZ or cc-pVTZ basis sets, whereas the HF dimer is described using aug-cc-pVDZ or aug-cc-pVTZ. Symbol *CP* refers to results obtained using the counterpoise correction scheme.

| double- $\zeta$ quality |                                                   |                                                               |      |                                                  |                                                   |                                                               |      |                                                   |  |
|-------------------------|---------------------------------------------------|---------------------------------------------------------------|------|--------------------------------------------------|---------------------------------------------------|---------------------------------------------------------------|------|---------------------------------------------------|--|
|                         | $\Delta E_{(\text{HF})_2@(\text{5,5})\text{CNT}}$ | $\Delta E_{(\text{HF})_2@(\text{5,5})\text{CNT}}^{\text{CP}}$ | BSSE | $\Delta E_{\text{HF}\dots\text{HF}}^{\text{in}}$ | $\Delta E_{(\text{HF})_2-(\text{5,5})\text{CNT}}$ | $\Delta E_{(\text{HF})_2-(\text{5,5})\text{CNT}}^{\text{CP}}$ | BSSE | $\Delta E_{\text{HF}\dots\text{HF}}^{\text{out}}$ |  |
| B3LYP                   | 2.3                                               | 2.0                                                           | 4.2  | -3.4                                             | -0.6                                              | 0.4                                                           | 1.1  | -3.3                                              |  |
| B3LYP-D3                | -16.5                                             | -12.3                                                         | 4.2  | -3.8                                             | -3.1                                              | -2.1                                                          | 1.1  | -3.7                                              |  |
| CAM-B3LYP               | -6.1                                              | -2.0                                                          | 4.1  | -3.9                                             | -1.2                                              | -0.2                                                          | 1.0  | -3.9                                              |  |
| PBE0                    | -6.2                                              | -1.2                                                          | 5.0  | -3.3                                             | -1.2                                              | -0.3                                                          | 0.9  | -3.4                                              |  |
| M06-HF                  | -16.7                                             | -12.0                                                         | 4.7  | -3.2                                             | -2.3                                              | -1.3                                                          | 1.0  | -3.5                                              |  |
| M06-2X                  | -16.0                                             | -12.1                                                         | 4.0  | -3.8                                             | -2.2                                              | -1.3                                                          | 0.9  | -3.7                                              |  |
| M06                     | -16.3                                             | -11.7                                                         | 4.6  | -3.6                                             | -2.1                                              | -1.1                                                          | 1.0  | -3.3                                              |  |
| triple- $\zeta$ quality |                                                   |                                                               |      |                                                  |                                                   |                                                               |      |                                                   |  |
|                         | $\Delta E_{(\text{HF})_2@(\text{5,5})\text{CNT}}$ | $\Delta E_{(\text{HF})_2@(\text{5,5})\text{CNT}}^{\text{CP}}$ | BSSE | $\Delta E_{\text{HF}\dots\text{HF}}^{\text{in}}$ | $\Delta E_{(\text{HF})_2-(\text{5,5})\text{CNT}}$ | $\Delta E_{(\text{HF})_2-(\text{5,5})\text{CNT}}^{\text{CP}}$ | BSSE | $\Delta E_{\text{HF}\dots\text{HF}}^{\text{out}}$ |  |
| B3LYP                   | 1.0                                               | 1.9                                                           | 1.0  | -3.5                                             | 0.1                                               | 0.4                                                           | 0.3  | -3.4                                              |  |
| B3LYP-D3                | -13.3                                             | -12.3                                                         | 0.9  | -3.9                                             | -2.4                                              | -2.1                                                          | 0.3  | -3.8                                              |  |
| CAM-B3LYP               | -3.0                                              | -2.0                                                          | 1.0  | -4.1                                             | -0.6                                              | -0.2                                                          | 0.3  | -4.0                                              |  |
| PBE0                    | -2.1                                              | -1.1                                                          | 1.0  | -3.4                                             | -0.6                                              | -0.3                                                          | 0.3  | -3.5                                              |  |
| M06-HF                  | -13.8                                             | -11.4                                                         | 2.4  | -3.4                                             | -1.8                                              | -1.3                                                          | 0.5  | -3.7                                              |  |
| M06-2X                  | -13.9                                             | -12.6                                                         | 1.3  | -4.3                                             | -1.8                                              | -1.5                                                          | 0.3  | -4.0                                              |  |
| M06                     | -14.6                                             | -12.5                                                         | 2.2  | -                                                | -1.8                                              | -1.4                                                          | 0.4  | -3.1                                              |  |

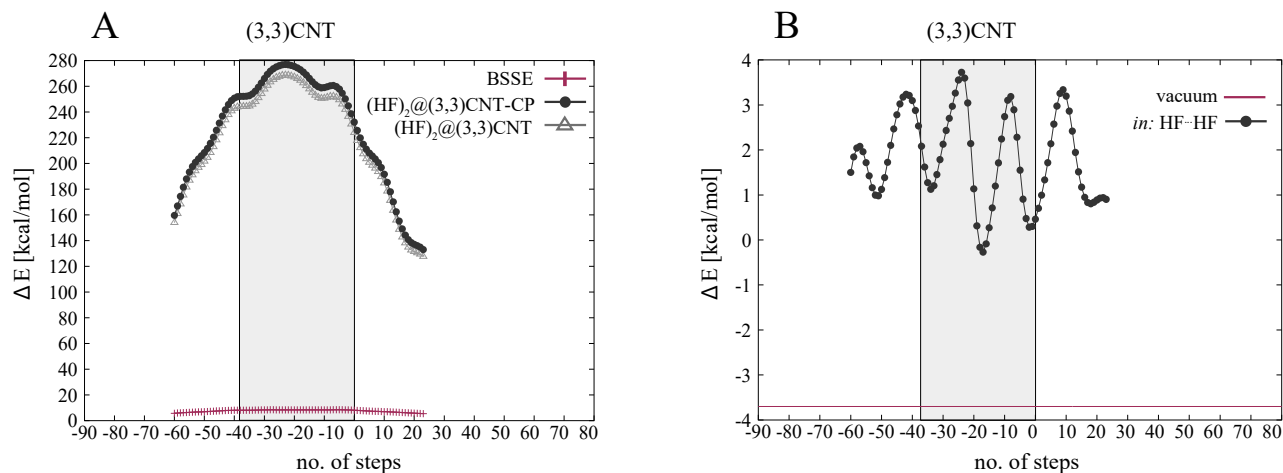

**Figure 1** (A) The interaction energy values calculated for the endohedral complexes formed between the HF dimer and (3,3)CNT. (B) The influence of spatial confinement, represented by (3,3)CNT, on the intermolecular interaction energy of the hydrogen fluoride dimer. All calculations have been performed using the M06-2X method and the Dunning's basis sets of double- $\zeta$  quality. Symbol *CP* refers to results obtained using the counterpoise correction scheme. The region highlighted in gray, between steps -38 to 0, corresponds to the situation when the entire hydrogen fluoride dimer is located inside the (3,3) carbon nanotube. The value of  $\Delta E_{HF\dots HF}$  in vacuum equals -3.7 kcal/mol (M06-2X/aug-cc-pVDZ).

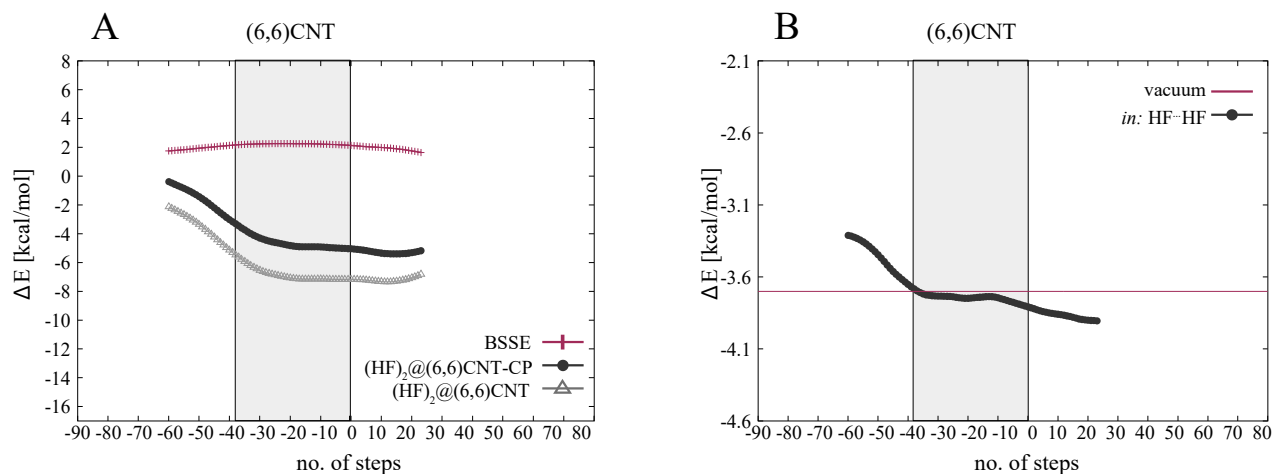

**Figure 2** (A) The interaction energy values calculated for the endohedral complexes formed between the HF dimer and (6,6)CNT. (B) The influence of spatial confinement, represented by (6,6)CNT, on the intermolecular interaction energy of the hydrogen fluoride dimer. All calculations have been performed using the M06-2X method and the Dunning's basis sets of double- $\zeta$  quality. Symbol *CP* refers to results obtained using the counterpoise correction scheme. The region highlighted in gray, between steps -38 to 0, corresponds to the situation when the entire hydrogen fluoride dimer is located inside the (6,6) carbon nanotube. The value of  $\Delta E_{HF\dots HF}$  in vacuum equals -3.7 kcal/mol (M06-2X/aug-cc-pVDZ).

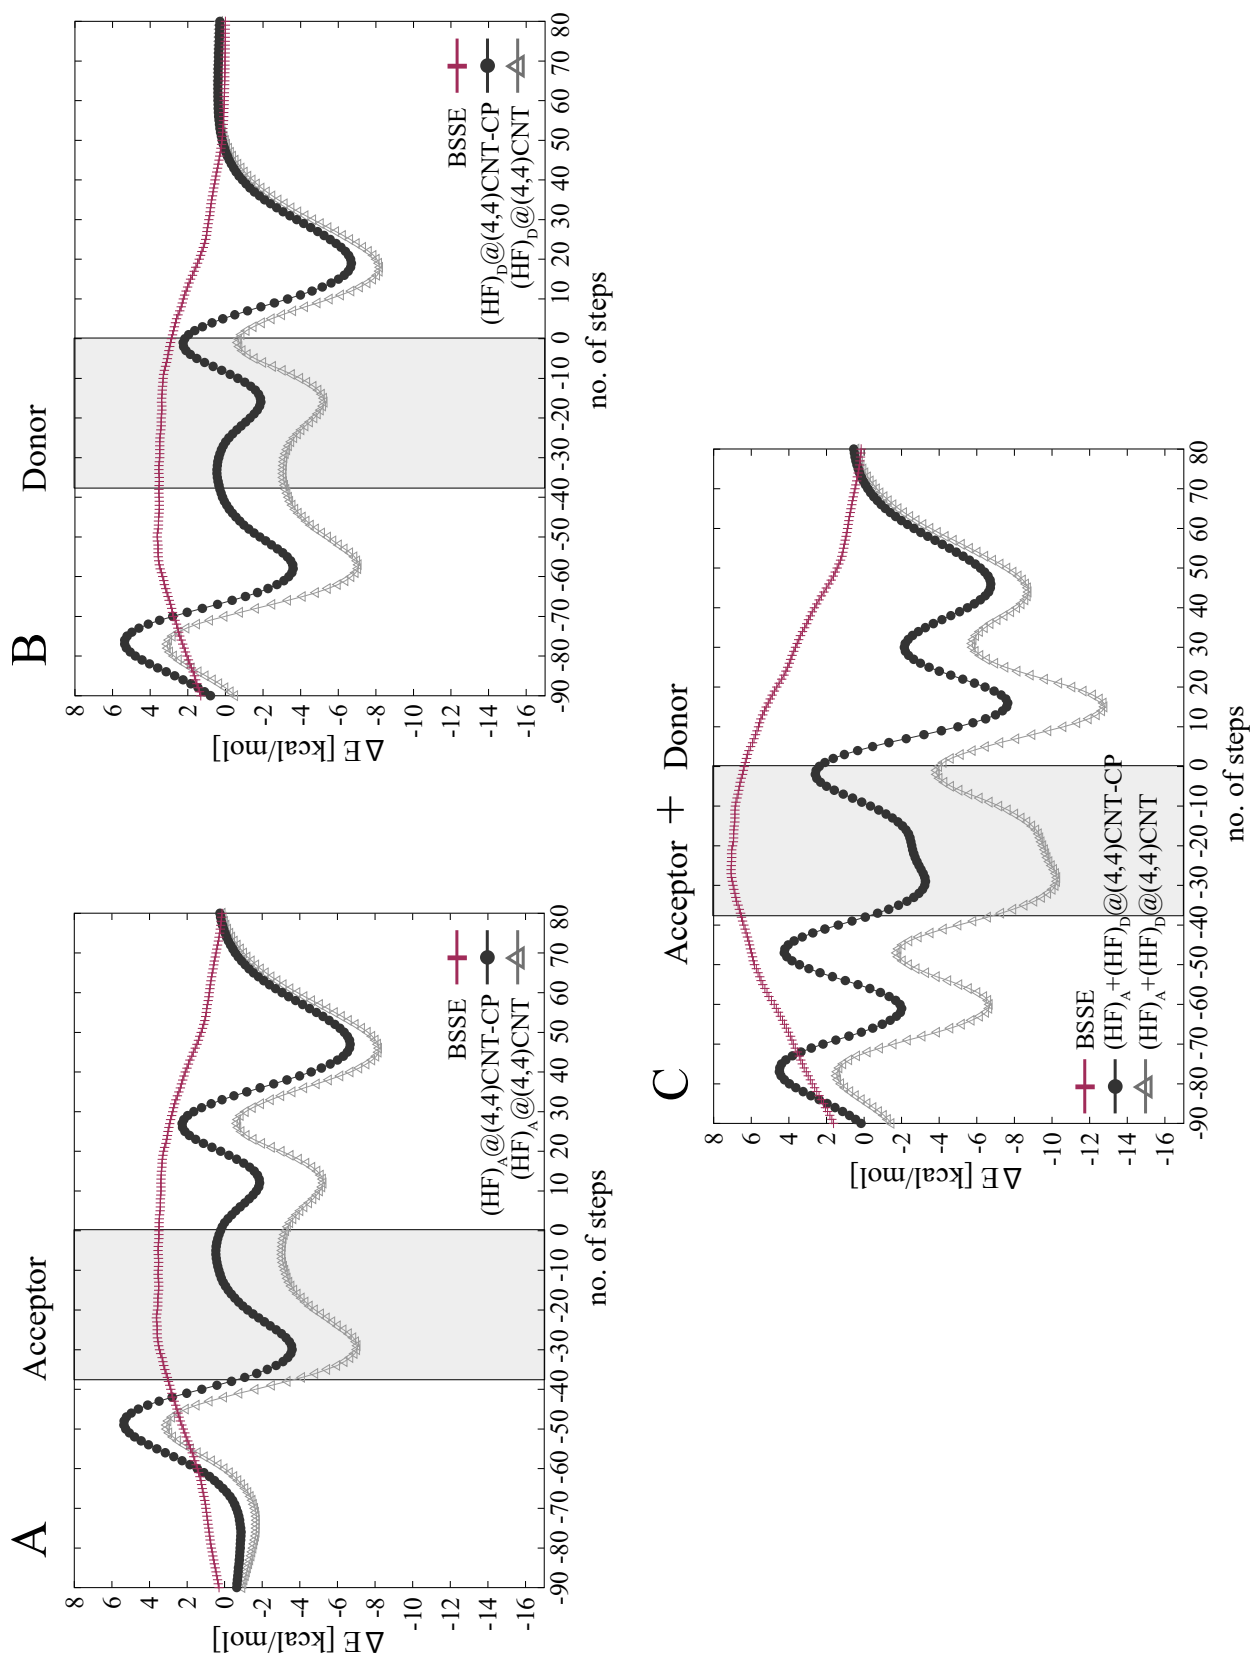

**Figure 3** The interaction energy values calculated for the endohedral complexes formed between (4,4)CNT and: *i)* the proton acceptor molecule as well as *ii)* the proton donor molecule (B). In panel (C) the interaction energy values obtained as a sum of the data computed for (HF)<sub>A</sub> and (HF)<sub>D</sub> molecules interacting with (4,4)CNT have been presented. All calculations have been performed using the M06-2X method and the Dunning's basis sets of double- $\zeta$  quality. Symbol CP refers to results obtained using the counterpoise correction scheme. The region highlighted in gray, between steps -38 to 0, corresponds to the situation when the entire hydrogen fluoride dimer is located inside (4,4)CNT.

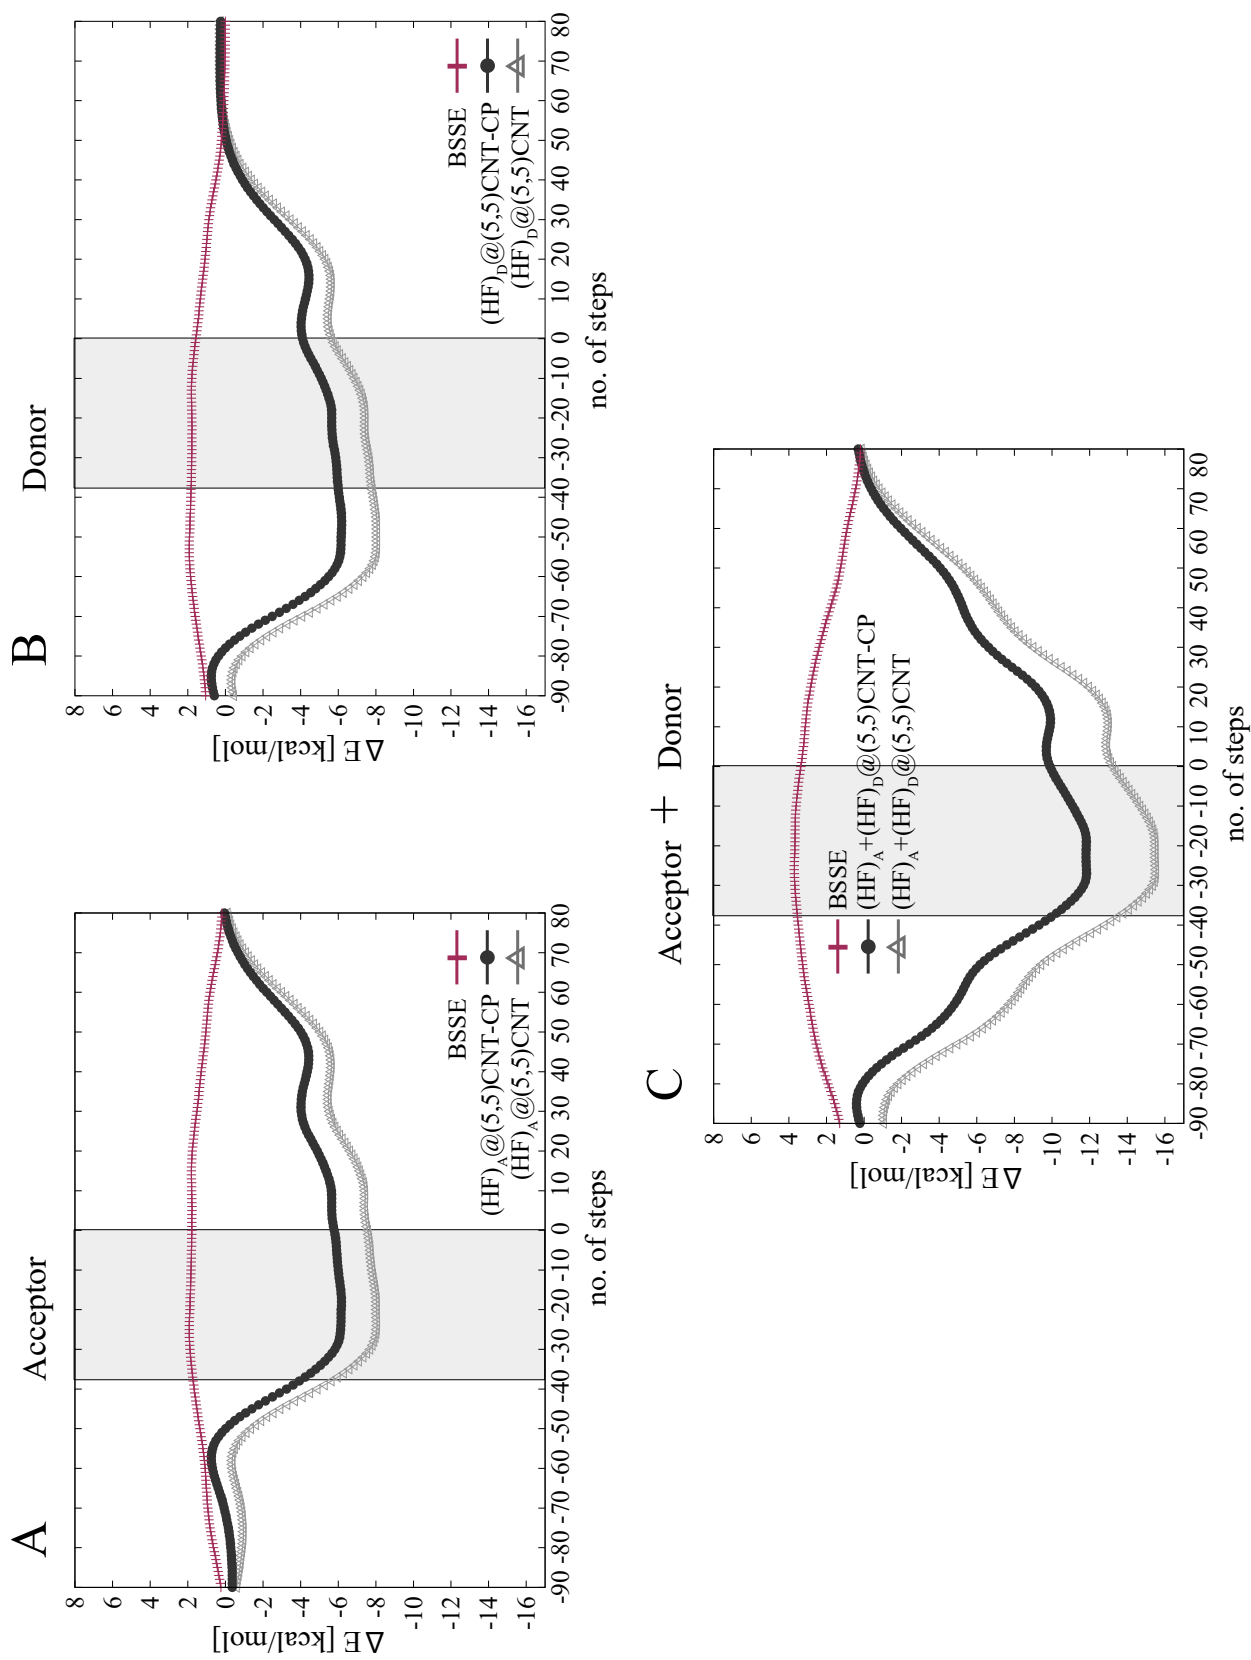

**Figure 4** The interaction energy values calculated for the endohedral complexes formed between (5,5)CNT and: *i)* the proton acceptor molecule as well as *ii)* the proton donor molecule (B). In panel (C) the interaction energy values obtained as a sum of the data computed for (HF)<sub>A</sub> and (HF)<sub>D</sub> molecules interacting with (5,5)CNT have been presented. All calculations have been performed using the M06-2X method and the Dunning's basis sets of double- $\zeta$  quality. Symbol CP refers to results obtained using the counterpoise correction scheme. The region highlighted in gray, between steps -38 to 0, corresponds to the situation when the entire hydrogen fluoride dimer is located inside (5,5)CNT.
